# Supplementary material
Source: PubMed Central journal article supplement (PMC10019281)

| Study or Subgroup     | n-3 PUFAs |      |            | Control |      |            | Weight        | Mean Difference<br>IV, Random, 95% CI | Year |
|-----------------------|-----------|------|------------|---------|------|------------|---------------|---------------------------------------|------|
|                       | Mean      | SD   | Total      | Mean    | SD   | Total      |               |                                       |      |
| Gadek 1999            | 11        | 7.5  | 70         | 14.8    | 11   | 72         | 13.0%         | -3.80 [-6.89, -0.71]                  | 1999 |
| Pontes-Arruda 2006    | 17.2      | 4.9  | 55         | 23.4    | 3.5  | 48         | 15.1%         | -6.20 [-7.83, -4.57]                  | 2006 |
| Singer 2006           | 13.5      | 11.8 | 46         | 15.6    | 11.8 | 49         | 10.3%         | -2.10 [-6.85, 2.65]                   | 2006 |
| Thiella 2011          | 26.1      | 14.2 | 20         | 21.2    | 9.1  | 20         | 6.8%          | 4.90 [-2.49, 12.29]                   | 2011 |
| Stapelton 2011        | 11.9      | 10.6 | 41         | 17.4    | 14.8 | 48         | 9.5%          | -5.50 [-10.80, -0.20]                 | 2011 |
| Gupta 2011            | 16        | 7.6  | 31         | 15.9    | 6.5  | 30         | 12.2%         | 0.10 [-3.45, 3.65]                    | 2011 |
| Parisch 2014          | 15        | 3.5  | 29         | 15.6    | 4.3  | 29         | 14.6%         | -0.60 [-2.62, 1.42]                   | 2014 |
| Shirai 2015           | 17.6      | 8.2  | 23         | 25.9    | 12.5 | 23         | 8.3%          | -8.30 [-14.41, -2.19]                 | 2015 |
| Kagan 2015            | 19.5      | 15.3 | 62         | 16.4    | 11.3 | 58         | 10.2%         | 3.10 [-1.69, 7.89]                    | 2015 |
| <b>Total (95% CI)</b> |           |      | <b>377</b> |         |      | <b>377</b> | <b>100.0%</b> | <b>-2.28 [-4.82, 0.25]</b>            |      |

Heterogeneity: Tau<sup>2</sup> = 10.40; Chi<sup>2</sup> = 37.72, df = 8 (P < 0.00001); I<sup>2</sup> = 79%  
Test for overall effect: Z = 1.76 (P = 0.08)

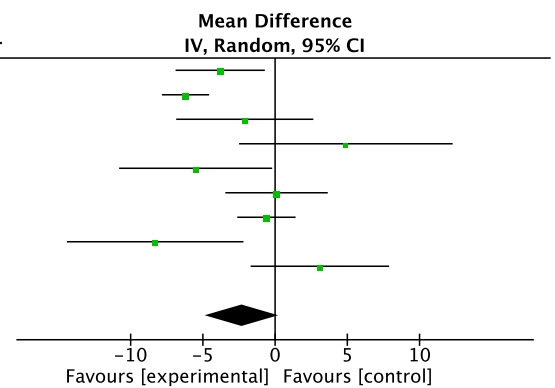

Supplement: mmc2.pdf [file mmc2.pdf]
