# Supplementary material
Source: PubMed Central journal article supplement (PMC10019281)

| Study or Subgroup     | n-3 PUFAs |      |            | Control |      |            | Weight        | Mean Difference    |                      | Year |
|-----------------------|-----------|------|------------|---------|------|------------|---------------|--------------------|----------------------|------|
|                       | Mean      | SD   | Total      | Mean    | SD   | Total      |               | IV, Random, 95% CI | 95% CI               |      |
| Gadek 1999            | 27.9      | 17.6 | 70         | 31.1    | 20.4 | 72         | 30.5%         | -3.20              | [-9.46, 3.06]        | 1999 |
| Stapelton 2011        | 23        | 18.3 | 41         | 27.6    | 20.6 | 48         | 22.8%         | -4.60              | [-12.68, 3.48]       | 2011 |
| Gupta 2011            | 21.5      | 13.5 | 30         | 26.6    | 18.2 | 30         | 22.7%         | -5.10              | [-13.21, 3.01]       | 2011 |
| Kagan 2015            | 33        | 25.7 | 62         | 27.1    | 17.3 | 58         | 23.9%         | 5.90               | [-1.89, 13.69]       | 2015 |
| <b>Total (95% CI)</b> |           |      | <b>203</b> |         |      | <b>208</b> | <b>100.0%</b> | <b>-1.78</b>       | <b>[-6.64, 3.08]</b> |      |

Heterogeneity: Tau<sup>2</sup> = 9.95; Chi<sup>2</sup> = 5.04, df = 3 (P = 0.17); I<sup>2</sup> = 40%  
 Test for overall effect: Z = 0.72 (P = 0.47)

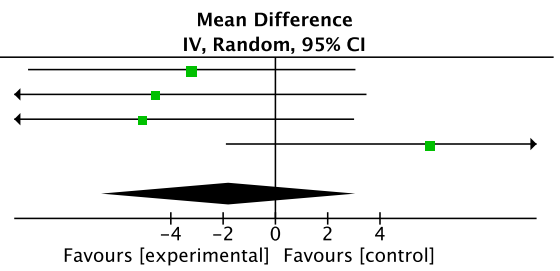

Supplement: mmc3.pdf [file mmc3.pdf]
