# Supplementary material
Source: PubMed Central journal article supplement (PMC10019281)

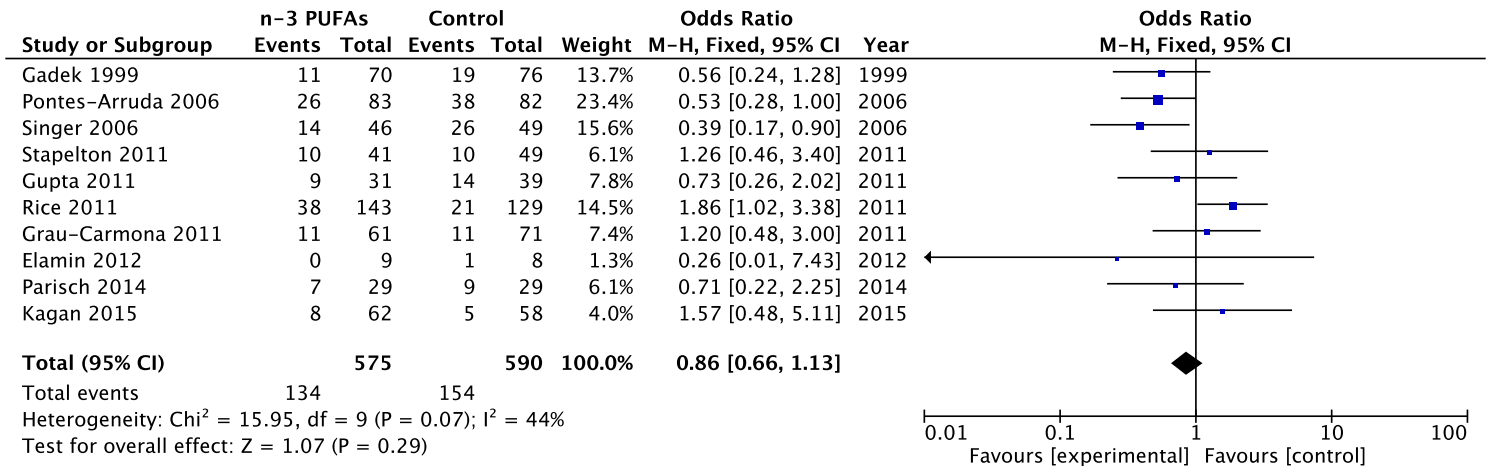

Supplement: mmc1.pdf [file mmc1.pdf]

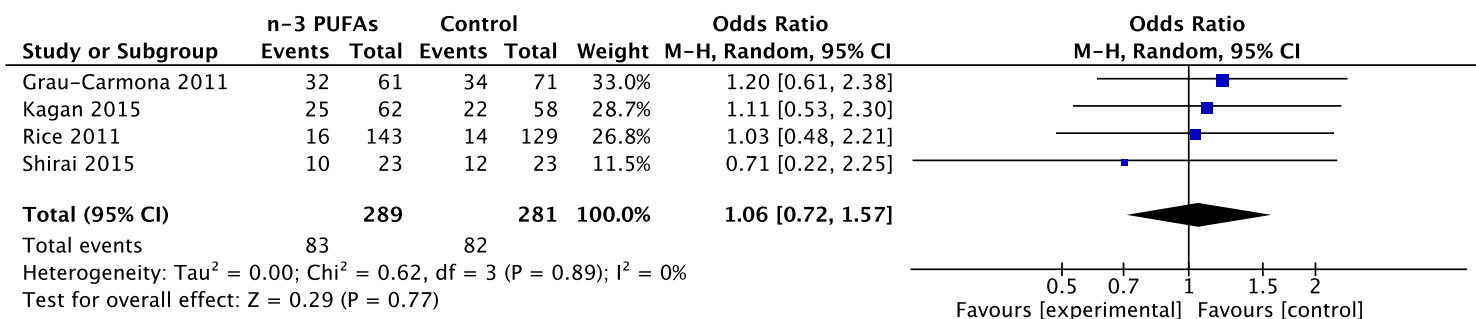

Supplement: mmc4.pdf [file mmc4.pdf]
